# Supplementary material for: Measurement of specific surface area of fresh solid precipitation particles in heavy snowfall regions of Japan
Source: Copernicus journal article supplement (doi:10.5194/tc-2019-78), 2019-05-07
Supplement: Supplementary file [file tc-2019-78-AC4-supplement.pdf]

Measurement of specific surface area of fresh solid precipitation particles in heavy snowfall regions of Japan

5 Satoru Yamaguchi<sup>1</sup>, Masaaki Ishizaka<sup>1</sup>, Hiroki Motoyoshi<sup>1</sup>, Sent Nakai<sup>1</sup>, Vincent Vionnet<sup>2,3</sup>, Teruo Aoki<sup>4</sup>, Katsuya Yamashita<sup>1</sup>, Akihiro Hashimoto<sup>5</sup>, and Akihiro Hachikubo<sup>6</sup>

<sup>1</sup>Snow and Ice Research Center, National Research Institute for Earth Science and Disaster Resilience, Nagaoka, 940-0821, Japan  
10 <sup>2</sup> Univ. Grenoble Alpes, Université de Toulouse, Météo-France, CNRS, CNRM, Centre d'Etudes de la Neige, Grenoble, France  
<sup>3</sup> Centre for Hydrology, University of Saskatchewan, Saskatoon, Canada  
<sup>4</sup> Arctic Environment Research Center, National Institute of Polar Research, Japan  
<sup>5</sup> Meteorological Research Institute, Japan Meteorological Agency, Tsukuba, Japan  
<sup>6</sup> School of Earth, Energy and Environmental Engineering, Kitami Institute of Technology, Kitami, 090-8507, Japan

15 Correspondence to: Satoru Yamaguchi ([yamasan@bosai.go.jp](mailto:yamasan@bosai.go.jp))

**Abstract:** In countries such as Japan, particular solid precipitation particles (PP) like the unrimed PP and graupel have potential to form a weak layer in snow that subsequently triggers slab avalanches. An understanding of weak PP layers is therefore essential for avalanche prevention authorities to design a predictive model for slab avalanches triggered by those layers. The specific surface area (SSA) is a parameter that could characterize the physical properties of PP. The SSAs of solid PP were measured for four winters (from 2013/2014 - 2016/2017) in Nagaoka, one of the heaviest snowfall-experiencing cities in Japan. More than 100 SSAs of PP were measured during the study period using gas absorption method. The measured SSA values range from 42 to 153 m<sup>2</sup> kg<sup>-1</sup>. PP under melting conditions show comparatively smaller values. Unrimed and slightly rimed PP exhibited low SSA, whereas heavily rimed PP and graupel exhibited high SSA. The degree of PP riming depends on the synoptic meteorological conditions. Based on the potential of weak PP layer formation with respect to the degree of riming of PP, the results indicate that SSA is a useful parameter for describing the characteristics of PP to predict avalanches triggered by weak PP layers. The study found that the values of SSA strongly depend on wind speed (*WS*) and wet-bulb temperature (*Tw*) on the ground. SSA increases with increase in *WS*, and decreases with increase in *Tw*. Using *WS* and *Tw*, an equation to empirically estimate the SSA of fresh PP in Nagaoka was established. The equation successfully reproduced the fluctuation of SSA. The SSA equation, with the meteorological data, is an efficient first step toward describing the development of weak PP layers in the snow cover models.

削除: Vincent

削除: sometimes

削除: W

削除: are

削除: It is

削除: weak PP

削除: the

書式変更: フォント : 10 pt

削除: the

削除: than that without melting

# 1. Introduction

Individual snow crystals are made of ice structures with unique, intricate geometries (Magono and Lee, 1966). The specific surface area (SSA) of snow is defined as its surface area per unit mass or volume, and includes information on the size and shape of the snow particles. Therefore, SSA is a key parameter in understanding the exchange of matter and energy between a snow-covered surface and the atmosphere (Domine et al., 2006; 2007; 2008) and in modeling the mass transfer of air or water in snow (e.g. Arakawa et al., 2009, Colonne et al., 2012). To simulate accurate continuous change of the physical properties of snow, the formulation of temporal variations in the SSA are important. Several studies (Legagneux et al., 2003; 2004, Legagneux and Domine, 2005, Taillandier et al., 2007) have proposed empirical equations for the time variation of SSA, in which an initial value of SSA was used. Therefore, the initial values of SSA, namely SSA of fresh precipitation particles (PP), are essential to simulate the time variation of SSA in natural snow cover.

PP have the potential to form a weak layer in a snowpack, which may trigger slab avalanches (Akitaya and Shimizu, 1988, McClung and Schaerer, 1993). The formation of weak PP layers should be considered to be dependent on the degree of PP riming (LaChapelle, 1967). Construction on the degree of PP riming is hence a key factor in designing a predictive model for slab avalanches triggered by weak PP layers. To investigate the types of weak layers in surface avalanche, McCammon and Schweizer (2002) reported that the main cause of weak layer in the Swiss Alps and Canada is the recrystallization-type layer: depth hoar, faceted crystal, and surface hoar, while the main cause of weak layers of snowpack in Japan is the PP types (Ozeki and Akitaya, 1995, Matsumura, 2002, Ikeda, 2007). Therefore, forecast of weak-PP-layer-triggered avalanche is necessary for avalanche prediction in Japan. Several disastrous avalanches due to weak-pp-layer have recently occurred in Japan: In February 2014, hundreds of avalanches occurred simultaneously in the Kanto region, which typically receives limited snowfall during the winter. Due to the risk of avalanche, many villages, some with over 9,000 residents were cut-off from access to roads and services (Nakamura et al., 2014, Kamiishi and Nakamura, 2016). In March 2017, eight people, seven of whom were high school students, lost their lives in an avalanche during an extracurricular outing (Nakamura et al., 2017, Araki, 2018).

Akitaya and Shimizu (1988) reported that the large-size falling broad-branched unrimed snow crystals can form a weak layer when they fall under windless conditions due to low initial density. From the view of physical characteristics of PP layer, several studies (Shidei, 1953, Nakamura et al., 2014, Ishizaka et al., 2018) reported that snow layers consisting of unrimed snow crystals were fragile and triggered snow avalanches, even when the weak PP layers in the snowpack were shallow. In fact, the measured repose angle with the unrimed snow crystals were 35–45° (Ishizaka et al., 2018; Kamiishi et al., 2016), much smaller than those of the rich-rimmed snow crystals (> 90°) reported by Narita and Takeuchi (2009). These results indicate the potential relationship between avalanche behavior and the weak PP-layer characteristics. However, the dependence of avalanche characteristics on PP which are necessary in predicting the potential of a weak PP layer to trigger an avalanche is still debated because previous studies could not gather any objective physical information on PP, such as shape, size and riming ratio. To solve this problem, the SSA of snow is considered an ideal parameter to form detailed information of PP.

削除: For these reasons

削除: of snow cover

削除: important to accurately simulate the physical properties of snow

削除: sometimes

削除: c

削除: s

移動 (挿入) [1]

削除: Actually,

削除:

削除: S

削除: Because of

削除: including

削除: 。

削除:

削除: ,

書式変更: インデント: 最初の行 : 1 字

削除: small

削除: because its initial

削除: is small

削除: which are

Several studies in the past have reported SSA measurements of fresh snow (Legagneux et al., 2002, Cabanes et al., 2002, Domine et al., 2007, Schleef, 2014). Their measurement interval after the snowfall showed wide variations from several hours to a day. In general, SSA decreases with time due to metamorphism (Legagneux et al., 2003; 2004, Cabanes et al., 2003, Legagneux and Domine, 2005, Taillandier et al., 2007). Kerbrat et al. (2008) implied that smoothing of the snow crystal surface due to the Kelvin effect is very fast, i.e., surface roughness of the size of several micrometers disappears after a day, even at temperatures as low as -40 °C, and the smoothing accelerates with increase in the temperature. In general, the size of a riming droplet (cloud drop) is in the order of one to ten micrometers, as reported by Harimaya, (1975) and Mosimann et al. (1994). Therefore, SSA measurement within short intervals is needed to model the degree of PP riming, especially in warmer environment, which is common in Japan. Snow-cover models, which are used for avalanche forecasting (e.g. Brun et al., 1992, Lehning et al., 1999), generally require input data with high time resolution (e.g. 1 h) for avalanche forecasting. Therefore, if information on PP is to be introduced in snow-cover models using the SSA, then a dataset of SSA information on fresh PP with high time resolution must be developed. Moreover, this information should contribute to the improvement of the SSA of PP treatment in the snow-cover models, which are basically simplified in the model, e.g., in the Crocus snowpack model (Brun et al., 1992; Vionnet et al., 2012), the maximal SSA value of PP is 65 m<sup>2</sup> kg<sup>-1</sup> for low wind conditions and it decreases with increasing wind speed down to 25 m<sup>2</sup> kg<sup>-1</sup> (Vionnet et al., 2012, Carmagnola et al., 2014).

The SSA measurements of fresh PP were conducted over short intervals (1–2 hours) in an area in Japan that receives heavy annual snowfall, and the measurements were compared to meteorological data and detailed falling snow data for discussing the dependency of SSA on these parameters. Based on these analyses, an empirical equation to estimate the SSA of fresh PP using surface meteorological data was proposed for introducing detailed information on PP to the snow metamorphism models.

## 2. Methodology

### 2.1. Observation site

The SSA observations were conducted over four winters from 2013/2014 to 2016/2017, at the Snow and Ice Research Center (SIRC), National Research Institute for Earth Science and Disaster Resilience (NIED), Nagaoka, Japan (37°25'N; 138°53'E; 97 m a.s.l.). The SIRC is located in a coastal region facing the Sea of Japan, where strong northwesterly monsoons blow from Siberia to the Japanese islands, accumulating large amounts of water vapor when passing over the warm sea and bringing heavy snowfall. The climatic condition considered at the SIRC includes a typical maximum winter snow height greater than 1.4 m, but a mean daily winter air temperature (Dec–Feb) larger than 2 °C (Yamaguchi et al., 2018). Various types of solid PP (snow flake, graupel, riming crystal, unrimed crystal, melting snow crystal, sleet, etc.) appear at the SIRC and the type of PP frequently changes within a short interval due to the change of precipitation mode (Ishizaka et al., 2013).

The Falling Snow Observatory (FSO) (Fig. 1a) at the SIRC has a cold room (-5 °C) with a 1.2 × 0.6 m roof opening (Fig. 1b) (Ishizaka et al., 2013; 2016). This setup allows the accumulation of falling snow on a flat table in the cold room under windless conditions (Fig. 1c). The PP photographs are automatically captured in the cold room using a belt conveyer system

削除: 's

削除: of PP

削除: ,

削除: treats that

削除: of SSA

削除: data

削除: .

削除: greater

削除: in winter

with a close-up camera (Fig. 1d). Additionally, the characteristics of falling snowfall particles, including size and fall speed, are automatically measured using a CCD camera system (Fig. 1e) with particle size resolution of 0.25 mm for width and 0.50 mm for height (Ishizaka et al., 2004). Using these characteristics, Ishizaka et al. (2013) presented a new parameter that quantitatively describes the main types of snowfall hydrometeors and reflects the contribution of all hydrometeors to precipitation. In their method, the dominant snowfall type was represented by a pair of characteristics, size and fall speed, which were obtained from the average size and fall speed and weighted by the mass flux of all measured hydrometeors. This is termed the center of mass flux (CMF) distribution. Because size-fall speed relationship of hydrometeors is a good representation of particle types, the dominant snow type in a snowfall event may be deduced from the location of the CMF in size-fall speed coordinates. Based on the concept of CMF, Ishizaka et al. (2016) also established approximated relationships between CMF density and initial density. These data were used to check whether measured SSA was under single PP type conditions or not. Moreover, the detailed characteristics of falling snow produced by the CMF was used when discussing the relationship between the measured SSA of fresh PP and the characteristics of falling snow (Section 3.4).

The SIRC also acquires standard meteorological measurements [air temperature (0.2 °C) and relative humidity (2%) at 3.5 m above ground level, wind speed (0.3 m s<sup>-1</sup>) and wind direction (3 °) at 8.7 m above ground level, precipitation (3%) at 3.1 m above ground level, incoming and outgoing shortwave (10 μ V W<sup>-1</sup> m<sup>-2</sup>)/longwave (10 μ V W<sup>-1</sup> m<sup>-2</sup>) radiations at 6.5 m above ground level, air pressure (±0.35hPa) measured at 3.0 m above ground level, and surface temperature (0.5 °C), snow height (2.5 cm), and snow water equivalents (10 mm)] at various time resolutions (1 min, 10 min, and 1 h) on field (Yamaguchi et al., 2018). Here, the values in the parentheses signify the accuracy of each sensor. These meteorological data were used with a 1-min resolution for conditioning the SSA data (Section 3.2) and use the same for discussions on the relationship between the measured SSA of fresh PP and near-surface meteorological data (Section 3.5). This study uses these meteorological data with a 10-min resolution for estimating the SSA with an empirical equation (Section 3.6). In addition to these measurements, the SIRC also operates a Doppler radar on the rooftop of its building and gathers information on snow clouds during the winter season (Nakai et al., 2019). This study used the Doppler radar data when discussing the relationship between the SSA and radar echo patterns relating to the development of snow clouds (Section 3.3). In addition to these data, weather charts produced by the Japan Meteorological Agency (<http://www.data.jma.go.jp/fcd/yoho/hibiten/index.html>) were used in discussions on the synoptic meteorological conditions (Section 3.3).

## 2.2 Measurement of specific surface area of fresh PP

The methane gas adsorption method (Domine et al., 2001, 2007; Legagneux et al., 2002) was used to measure the SSA of fresh PP. Principles of the methane gas adsorption method have been described in detail by Legagneux et al. (2002). Recently, a portable device was developed for the methane adsorption method (Fig. 1f) (Hachikubo et al., 2014; 2018). This device allows to measure the SSA of snow within a 1 h resolution [measurement repeatability (standard deviation) of 3% (Hachikubo et al. 2012; 2013)]. The characteristics of this device make it convenient for use in the current study of the SSA of fresh PP

削除: ,

削除: as

削除:

削除: T

削除: The authors of the current paper used the detailed characteristics of falling snow produced by the CMF

削除:

削除:

書式変更: 上付き

削除: °

削除: 7-

書式変更: 上付き

書式変更: 上付き

書式変更: 上付き

書式変更: 上付き

削除: °C

削除: are

削除: (air temperature and relative humidity at 3.5 m above ground level, wind speed and wind direction at 8.7 m above ground level, precipitation at 3.1 m above ground level, incoming and outgoing shortwave/longwave radiations at 6.5 m above ground level, air pressure measured at 3.0 m above ground level, and surface temperature, snow height, and snow water equivalents) at various time resolutions (1 min, 10 min, and 1 h) on field (Yamaguchi et al., 2018).

削除: information

削除: SIRC's

削除:

削除: when

削除: discussing

削除:

削除: .

削除: (

削除: )

削除: (

削除: very

with a short interval measurement. The samples used in this study were made of fallen snow deposited within 1–2 h on a table in a cold room (-5 °C) at the FSO. The device requires a 30-mL sample for each measurement (Fig. 1g). The samples were directly taken from the snow deposited on the table during measurement interval, however, the PP gathered by a broom were added to the sample when the snow deposited on the table was not high enough. The measured SSAs in this study were calculated by dividing the measured surface area of the sample by its mass, which was in turn measured by an electronic balance with a 0.01-g resolution. Therefore, its unit is m<sup>2</sup> kg<sup>-1</sup>. Due to the short deposition time under the cold-room condition, the effect of metamorphism on the sample, which requires longer deposition time, was neglected in this study. The microphotographs of the sample using a microscope were manually captured to determine the crystal types.

### 2.3 Data selection

In the study, several selected data sets (Table 1) were provided for aim of each analysis. In the discussion of general characteristics of SSA of PP in Nagaoka (Section 3.1), all measured data were used. In the discussion of influence of melting effect (Section 3.2), all measured data were classified into two data sets: no melt events (NME) affected by no melt effect and melt events (ME) affected by melt effect, and then discussed. In the discussion of the relationship between SSA and synoptic meteorological conditions (Section 3.3), only NME was used. In Section 3.4 and 3.5, uniform fallings event (UFE), in which only data taken under a single PP type condition during the deposition period was selected from NME, and used for discussion. Detail information of data selection conditions are shown in each section.

## 3. Results and discussion

### 3.1 Measured SSA of fresh PP

A total of 102 SSA measurements were collected from the samples acquired over four winters (from 2013/2014 to 2016/2017). For the methane absorption method, the averaged heat of adsorption, which is an indicator of the judgment of measurement quality, for the 102 measurements was 2472 ±199 J mol<sup>-1</sup>, which was consistent with the value of 2540 ±200 J mol<sup>-1</sup> recommended by Domine et al. (2007). Therefore, the measurement results stand to reason. Figure 2a shows the comparison results between results of this study and SSA of natural freshly fallen snow in the previous studies (Domine et al., 2007, Schleef, 2014). Hereafter, data of Domine et al. (2007) is referred to as Dom2007 and data of Schleef (2014) as Sch2014. Table 2 shows detailed information on Dom2007 and Sch2014. Figure 2a also shows the optical radius ( $R_{opt}$ ) for the data sets estimated from the SSA using the following equation (Grenfell and Warren, 1999):

$$R_{opt} = \frac{3}{SSA \times \rho_i} \quad (1),$$

where,  $\rho_i$  is the density of ice (917 kg m<sup>-3</sup>).

The sample numbers of the SSA measurements in this study are larger than those in the previous studies (Domine et al., 2007, Schleef, 2014), and they present a wider range of SSA values. This could be explained by the more diverse variety of PP types in this study. The average value of data in this study (96 m<sup>2</sup> kg<sup>-1</sup>) is much larger than those Dom2007 (73 m<sup>2</sup> kg<sup>-1</sup>).

削除: new

削除: L

削除: the

削除: but

移動 (挿入) [2]

削除: did

削除: have enough

削除: eight

削除: Because of

上へ移動 [2]: The measured SSAs in this study were calculated by dividing the measured surface area of the sample by its mass, which was in turn measured by an electronic balance with a 0.01-g resolution. Therefore, its unit is m<sup>2</sup> kg<sup>-1</sup>.

書式変更: インデント : 最初の行 : 1 字

書式変更: フォント : 斜体

書式変更: フォント : 斜体

削除: T

削除: c

削除: our results

削除: .

削除: (

削除: that of

削除: )

削除: the

削除: f

削除: The f

削除: igure

削除: s

削除:

削除: in previous studies (

削除: .

5 while the average value of Sch2014 (93 m<sup>2</sup> kg<sup>-1</sup>) shows similar values as this study, the sample number of Sch2014 (8 cases) is too small to discuss statistically. Therefore, we discuss the comparison results between Dom2007 (68 cases) and this study (102 cases). Fassnacht et al. (1999) simulated the amount of change in the SSA of a dendritic snow crystal caused by the presence of riming drops on the surface. They concluded that the SSA could be doubled if 20% of the surface of the snow crystal were covered by needle- or plate-shaped rime. Therefore, one of the reasons the averaged value in this study is larger is the measured data of fresh PP includes many cases of graupel and rich-rimed snow crystals. Another reason could be the condition of the samples. The samples in this study were measured within a short time (1–2 hours) after deposition, so the effect of metamorphism should be small. On the other hand, the samples in Dom2007 were procured at a longer time span after deposition. Thus, the effect of metamorphism on the samples in those studies should be larger than on the samples in this study. For these reasons, the results of this study show a more realistic value of the SSA of fresh PP.

10 Large variations in the measured SSA values were observed in every fourth winter (2013/2014: 64–153 m<sup>2</sup> kg<sup>-1</sup>, 2014/2015: 43–142 m<sup>2</sup> kg<sup>-1</sup>, 2015/2016: 42–148 m<sup>2</sup> kg<sup>-1</sup>, 2016/2017: 51–110 m<sup>2</sup> kg<sup>-1</sup>) (Fig. 2b). These results indicate that the SSA of fresh PP in the winter season in Nagaoka usually varies by more than two- or three-fold. Snow albedo is essentially a function of snow physical parameters including SSA. To evaluate the effect of fluctuation in SSA of fresh PP on its surface albedo, surface albedos in the UV (ultra-violet)-visible spectral region and the near-infrared spectral region were simulated using the measured maximum (77 μm) and minimum optical radii (22 μm) of fresh PP (Fig. 2), via the “physically based snow albedo model” (PBSAM) developed by Aoki et al. (2011). These simulations were conducted for the case of impurities-free snow under a clear sky condition at a solar zenith angle of 60°. Previous studies (Wiscombe and Warren, 1980, Aoki et al., 2011) show that the albedo at the NIR wavelengths is affected more significantly by the change in SSA than the albedo at the UV-visible wavelength range. This is due to the spectral behavior of the imaginary part of the complex refractive index of ice. In fact, the UV-visible (wavelength = 0.2–0.7 μm) albedo value simulated using the measured maximum and minimum optical radii show almost the same values (0.99), while the simulated NIR (wavelength = 0.7–3.0 μm) albedo values vary from 0.75 to 0.80. These results indicate that the information on SSA variation of fresh PP is important for the simulated evolution of the local surface radiation budget. Therefore, parameterization of SSA fluctuations is essential for accurate simulation of NIR albedo in natural snow.

### 3.2 Influence of melting effect in SSA of fresh PP

30 According to Yamaguchi et al. (2013), winter precipitation in Nagaoka frequently occurs at an air temperature of approximately 0 °C. In fact, the data in this study were partly measured at an air temperature of approximately 0 °C. Thus, some of the samples were affected by melting during the fall. To investigate the influence of melting on the measured SSA data, the measured data was classified into two categories: data without melting effect (no melt events) and data with melting effect (melt events) (Table 1). To classify these data, the wet-bulb temperature (Tw) during the falling snow period was used, which is a good indicator of the melting event (Matsuo et al., 1991); no melt events (NME) followed Tw < 0 °C condition,

削除: ,  
削除: 4:  
削除: 79  
削除: ini  
削除: but  
削除: .

削除: the previous studies

削除: season

削除:

削除: visible

削除: -

削除: show the albedo at the NIR wavelengths is affected by the change of SSA more significant than that for the visible

削除: In fact, the visible albedo value simulated using the measured maximum and minimum optical radii show almost the same values (0.99), while the simulated near-infrared (NIR) albedo values vary from 0.75 to 0.80, resulting from the SSA range of fresh PP

削除: These results indicate that the information on SSA variation of fresh PP should be important for the simulation of the NIR albedo

削除: fluctuation of

削除: correct

削除: I

削除: Iy

削除: was

削除: sometimes

削除: —

while *melt events* (EM) followed  $T_w \geq 0^\circ\text{C}$  condition. In this study, the period with falling snow during the sample period was first determined using the CMF data with a 1-min time resolution, because falling snow did not always occur continuously during the sample interval. Then, using the meteorological data also with 1-min time resolution, all the relevant meteorological elements were averaged over the period in which snowfall was observed, instead of averaging over all periods of the sample interval for calculation (hereinafter, the averaged meteorological data will indicate the data averaged only over the period of snowfall). In this study,  $T_w$  was calculated based on the “forward” analytical psychrometric equations (Bohren and Albrecht, 1998) that employ an iterative approach using averaged air temperature, relative humidity, and air pressure.

Figure 3 shows the classified results (ME and NME) using  $T_w$ . Thirty events were classified as *melt events* while 72 events were classified as NME. The SSA averaged over the ME ( $77 \pm 23 \text{ m}^2 \text{ kg}^{-1}$ ) is smaller than that of NME ( $103 \pm 28 \text{ m}^2 \text{ kg}^{-1}$ ). Here the values after  $\pm$  represent standard deviation. The difference in the SSA values between ME and NME should be mainly caused by the melting effect. Domine et al. (2007) reported an SSA value of  $50 \pm 11 \text{ m}^2 \text{ kg}^{-1}$  for fresh PP with melting effect, i.e., PP falling at  $T > 0^\circ\text{C}$ . Compared to the results of this study, the values in their study are smaller. Moreover, the SSA data under ME in this study include higher values ( $> 100 \text{ m}^2 \text{ kg}^{-1}$ ). Figure 4 shows the microphotographs of the two samples taken under ME with different  $T_w$ . The first sample, which showed evidence of melting under high  $T_w$  ( $0.6^\circ\text{C}$ ), had a small SSA ( $51 \text{ m}^2 \text{ kg}^{-1}$ ) (Fig. 4a) while the second sample, which was taken under ME with low  $T_w$ , slightly higher than  $0^\circ\text{C}$ , did not reveal any substantial evidence of melting and had a large SSA ( $113 \text{ m}^2 \text{ kg}^{-1}$ ) (Fig. 4b). These results indicate that the degree of melting depends on  $T_w$ . Moreover, these also imply that the classification using  $T_w$  is not sufficient to distinguish between melt and no melt. Basically, data under NME show high SSA values but still include lower SSA values ( $< 77 \text{ m}^2 \text{ kg}^{-1}$ ). These results indicate that fresh PP can have a small SSA even without melting, and other factors, such as meteorological conditions within the clouds and the atmosphere, for controlling SSA of fresh PP ought to be considered.

### 3.3 Relationship between SSA of fresh PP and synoptic meteorological condition

The measured SSA of fresh PP sometimes reveals small values without melting (Fig. 3). To investigate the cause of these small SSA values, the study will focus on the synoptic meteorological conditions during snowfall. Snowfall patterns in Japan can be roughly grouped into two categories (Nakamura et al., 1987): monsoon-type snowfall, wherein strong northwesterly monsoons blow from Siberia to the Japanese islands, and cyclone-type snowfall, in which cyclones blow from the south to the north along the archipelago. The first type was named “M-type” (Fig. 5a) and the second “C-type” (Fig. 5b). In Nagaoka, snowfall events under the M-type are dominant, while snowfall events under C-type rarely occur during the winter season (Nakamura et al., 1987). Based on classifications using the weather charts produced by the Japan Meteorological Agency (<http://www.data.jma.go.jp/fcd/yoho/hibiten/index.html>), 60 events resulted from M-type and 12 events from C-type in NME (72 events). Figure 6 presents the result of comparison of the SSA values between M-type and C-type. There is a clear difference in the SSA values between M-type and C-type: SSAs during M-type (average:  $112 \text{ m}^2 \text{ kg}^{-1}$ ) are much larger than those during C-type (average:  $60 \text{ m}^2 \text{ kg}^{-1}$ ). These results indicate that the SSAs of fresh PP in Nagaoka strongly depend on the

削除: H

削除: selected

削除: melt events and no melt events

書式変更: フォント: 斜体

書式変更: フォント: 斜体

削除: no melt events

削除: melt events

削除: the

削除: no melt events

削除: one

削除: melt events and no melt events

削除: under

書式変更: フォント: 斜体 (なし)

削除: melt events

削除: melt events

削除: melt event

削除: t

削除: no melt events

削除: an

削除: in which

削除: occurs

書式変更: フォント: 10 pt

削除: sixty

削除: the no melt data

削除: with

削除: is

synoptic scale precipitation condition. In general, the PP during the M-type pattern generally allows aggregation and riming to be predominant (Fig. 5c). Previous study (Cabanès et al., 2002) reported dendritic snowfall with rich riming to show the high SSA in the Canadian Arctic.

Colle et al. (2014) reported that fallen snow during the cyclone at Stony Brook in New York on the northeast coast of the United States showed consistent spatial patterns of habit and riming intensity relative to the cyclone structure. Little to no riming snowfall crystals occurred within the outer comma head to the north and northeast of the cyclone's eye and the western quadrant of the comma head, while moderately rimed snow crystal were observed in the middle of the comma head. In Japan, several studies with meteorological condition analyses (Nakamura et al., 2013, Akitaya and Nakamura, 2013) reported that unrimed snow crystals fell at the warm front of the cyclone and subsequently caused avalanches. These previous studies corroborate each other, namely, unrimed snow crystal occurred with the cyclone event. In fact, all observed crystals under C-type showed the unrimed snow crystal types as shown in Fig. 5d. From these results, it was concluded that the characteristics of PP under C-type, namely unrimed snow crystal types, reveal PP with small SSA. To predict weak PP layer avalanche, description of PP type information in numerical snow models is essential for reproducing the weak PP layer, this study considered the riming conditions of PP determined based on SSA values to be a good indicator for the potential of weak PP layer development in snowpack for numerical snow cover models.

When the measurements under M-type are investigated, SSA values of fresh PP still show a large variation in the range of  $64 \text{ m}^2 \text{ kg}^{-1}$ – $154 \text{ m}^2 \text{ kg}^{-1}$ . Nakai et al. (2005) reported that there were several snowfall conditions corresponding to different snow cloud behaviors under the M-type pattern. They investigated snow cloud behavior (snowfall modes) at the Niigata Prefecture, including Nagaoka, using Doppler radar echo under M-type, and then classified the snowfall modes according to six modes (Table 3). Based on their method, in this study, data under M-type were classified into several snowfall modes. 53 out of 60 sets of data under M-types were classified into four modes (T mode: 20 events, L mode: 24 events, D mode: 4 events, S mode: 5 events), while seven data sets could not be determined because of lack of radar data or difficulty in classification resulting from the complexity snowfall mode. In this study, SSA under the V mode and the M mode were not measured. Figure 7 shows the results of the SSA for each snowfall mode classification. For more information on grain shape and riming, the sample microphotographs of PP taken under each mode are also shown in Fig. 8. The values of SSA under the T and L modes show larger values (averaged SSA values of the T and L modes are  $120$  and  $119 \text{ m}^2 \text{ kg}^{-1}$ , respectively) than the other two modes. The previous study (Harimaya and Nakai, 1999) reported that falling snow crystals contain rich-rimed types under the T and L modes. As a matter of fact, the main types under the T and L modes in this study were the graupel and rich-rimed snow crystals (Fig. 8a and 8b). The measured values of SSA under the D mode (averaged SSA value of the D mode is  $93 \text{ m}^2 \text{ kg}^{-1}$ ) show smaller values than the T and L modes, but their values showed large fluctuations from  $60$ – $120 \text{ m}^2 \text{ kg}^{-1}$ . This result implies that various PP types, from slightly rimed snow crystal to rich-rimed snow crystal, should fall under the D mode. The microphotographs in Fig 8c show that different crystal types can fall under the D mode. Because of the small sample size of the D mode (only four cases), the critical condition between the PP fall with a large SSA and that with a small SSA could not

削除: , as well as riming

書式変更: インデント: 最初の行: 1 字

削除: s

削除: as

削除: Moreover, these results show the potential of SSA to describe riming condition of PP.

削除: 上へ移動 [1]:

The disastrous avalanches in Japan presented in chapter 1 were caused by Several disastrous avalanches have recently occurred in Japan: In February 2014, hundreds of avalanches occurred simultaneously in the Kanto region, which typically receives limited snowfall during the winter. Because of the risk of avalanche, many villages, with over 9,000 residents were cut-off from access to roads and service (Nakamura et al., 2014, Kamiishi and Nakamura, 2016). In March 2017, eight people, including seven high school students, lost their lives in an avalanche during an extracurricular outing (Nakamura et al., 2017, Araki, 2018). All of these avalanches were caused by the weak PP layer resulting from unrimed snow crystals under C-type conditions.

上へ移動 [1]: Several disastrous avalanches have recently occurred in Japan: In February 2014, hundreds of avalanches occurred simultaneously in the Kanto region, which typically receives limited snowfall during the winter. Because of the risk of avalanche, many villages, with over 9,000 residents were cut-off from access to roads and service (Nakamura et al., 2014, Kamiishi and Nakamura, 2016). In March 2017, eight people, including seven high school students, lost their lives in an avalanche during an extracurricular outing (Nakamura et al., 2017, Araki, 2018).

削除: this type of

削除: introduction of

削除: of PP type to

削除: To investigate the measurements

削除: 2

削除: 1

削除: Fifty-three

削除: 1

削除: of data

削除: un

削除: f

be established in this study. Although slightly larger than the values under cyclone-type (C-type), the measured values of SSA under the S mode (averaged SSA value of the S mode is  $75 \text{ m}^2 \text{ kg}^{-1}$ ) show smaller values than the other modes. Microphotographs of all samples under the S mode reveal unrimed and slightly rimed snow crystals as the classification of the riming degree for single crystal (Mosimann et al., 1993) (Fig. 8d). The sample size of the S mode (only five cases) does not help to reveal if all the cases under this mode have small SSA values, but the results do indicate that the PP with small SSA ( $< 80 \text{ m}^2 \text{ kg}^{-1}$ ) appeared even under monsoon-type (M-type). Therefore, the risk of avalanche caused by the weak PP layer, resulting from unrimed snow crystals fallen should not be neglected even under monsoon-type.

### 3.4 Relationship between SSA of fresh PP and detailed characteristics of PP produced by CMF analyses

In this section, the relationships between the SSA of fresh PP and their characteristics are discussed in detail. The PP type sometimes varies even for observation periods (1–2 h) (Ishizaka et al., 2016); therefore, it was necessary to select simpler cases with the same PP type during the sample deposition period, to clarify the relationship between the SSA of fresh PP and its characteristics. To examine the quality of PP type variations, CMF distribution of Ishizaka et al. (2016) during the sample deposition period was considered. In the analyses, CMF was averaged over the sample deposition period (averaged CMF) and over each 1-min interval (1-min CMF). Figure 9 shows the representative CMF plots under different conditions. In Fig. 9a, the pattern of a 1-min CMF can remain unchanged even as the particle size differed during the sample deposition period. In such a case, these events were regarded as “uniform falling events (UFE),” which have a single PP type during the deposition period. On the other hand, the pattern of a 1-min CMF in Fig. 9b can also fluctuate in size-fall speed coordinates, while the averaged CMF in Fig. 9b is located in an intermediate area during the sample deposition period. In such case, these events were regarded as “variant falling events,” which have mixed PP types during the deposition period. CMF distributions of all cases in NME were graphed and inspected visually based on these analyses, forty-nine UFE were selected from NME (Table 1). Figure 10 shows the results of comparison between data of NME (72) and data of UFE (49). Although the number of UFE is two-thirds the number of NME, UFE dispersion still follows a trend similar to that of NME. For this reason, hereinafter only data of UFE will be used for detailed analyses.

As shown in Figure 6, the SSA strongly depends on its synoptic scale condition, therefore, the relationship between SSA of fresh PP and detailed characteristics of PP should also depend on synoptic scale conditions. For this reason, firstly the UFE data were classified into the two synoptic scale conditions (M-type and C-type). In addition, M-type data were classified into three groups based on the PP types [aggregate group (AGG), graupel group (GRA), and small particle group (SMG)], using CMF analyses reported by Ishizaka et al. (2016) (Fig. 11). Although Ishizaka divided a small particle group (SMG) into two subgroups (S1 and S2), this study treated S1 and S2 as one group (SMG) (Fig. 11). Finally, four data groups (C-type, AGG, GRA, and SMG) were used for analyses.

In this study, three physical characteristics obtained from CMF analyses were adopted—averaged fall speed ( $V$ ) of PP and averaged apparent size ( $D$ ) of PP. These two elements were determined by the CCD image for each particle and then averaged

削除: C

削除: of riming

削除: small SSA

削除: (unrimed or slightly rimed snow crystals)

削除: M-type

削除:

削除: M

削除: Ishizaka et al. (2016)

削除: 's

削除:

削除: T

削除: (Fig. 9a)

削除: (Fig. 9b)

削除: this

削除: 9

書式変更: フォント: 斜体 (なし)

削除: no melt events

削除: became

削除: of

削除: no melt events

削除: its

削除: no melt events

削除: .

削除: ,

削除: and

削除: may

削除: its

削除: Therefore

削除: (

削除: )

削除: in their paper

削除: he authors in t

削除: Figure 12 shows the relationship between the SSA of fresh PP and detailed characteristics of the PP produced by the CMF analyses for each type.

over all the particles during the sample deposition period (Ishizaka et al., 2013). The ~~third physical characteristics is~~ the initial density ( $\rho_v$ ) ~~after the deposition on the ground~~, which was calculated based on five ~~minute~~ averaged CMF data using the method of Ishizaka et al. (2016). Though  $V$  and  $D$  were directly measured, the initial deposited densities were estimated value using  $V$  and  $D$ .

Figure 12 shows the relationship between the SSA of fresh PP and three physical characteristics of the PP produced for each data group. In the C-type group, significant correlations (p value is smaller than 0.05) between the measured SSA and all three physical characteristics could be obtained. Parameters  $V$  and  $\rho_v$  decreased with increasing SSA (Fig. 12j and Fig. 12l), while  $D$  increases with an increase in SSA (Fig. 12k). The relationship between the measured SSA and  $\rho_v$  under C-type group shows a similar trend as in Domine et al. (2007).

In the groups of AGG, GRA, and SMA under the M-type condition, only one significant correlation (p value  $\leq 0.05$ ) between SSA and  $D$  could be obtained in the GRA. The p values for other combinations were not enough to assure significant correlations (p value  $> 0.05$ ). Basically, the trends of GRA and SMA remain the same, while those of AGG are different from the other two groups. The trend between  $D$  and SSA in the GRA, which is a positive correlation, may result from the process of graupel growth. It is likely that larger graupel can collect a large number of small-rimed drops and also protect larger number of small-rimed drops in its body from sublimation during its fall. Therefore, a larger graupel stored larger number of small-rimed drops in its body. This is only a hypothesis, and further investigation with more measurements is needed to prove it. Furthermore, a simulation using a detailed cloud physics model, such as Hashimoto et al. (2018a; 2018b), will equip this study with some useful information to understand the relationship between  $D$  and SSA in the GRA group.

As shown in Fig. 6, all measured SSA values of an unrimed crystal in C-type group are less than  $90 \text{ m}^2 \text{ kg}^{-1}$  (the maximum value being  $88 \text{ m}^2 \text{ kg}^{-1}$ ). In addition, measured SSA values under the S mode under M-type condition, which include unrimed and lightly rimed snow crystals, are in the range of  $70$  to  $78 \text{ m}^2 \text{ kg}^{-1}$  (in the AGG). The relationship between SSA and  $D$  and  $\rho_v$  of AGG seem to be more complex than other two groups. These results may be resulting from the different degrees of riming on the crystal. This study simply assumes that the crystal having an SSA less than  $90 \text{ m}^2 \text{ kg}^{-1}$  is an unrimed crystal type or lightly rimed snow crystal, while the crystal having an SSA of over  $90 \text{ m}^2 \text{ kg}^{-1}$  is a rimed crystal; densely rimed, graupel-like, and graupel, as the classification of riming degree for a single crystal (Mosimann et al., 1993). In fact, a great majority of SSAs of graupels (GRA), which have a large number of rimed drops in them, are larger than  $90 \text{ m}^2 \text{ kg}^{-1}$  (Fig. 12d, e, f). Moreover, SSAs in the SMA, which should be made of small ice crystals that may have aggregated droplets, are also mostly larger than  $90 \text{ m}^2 \text{ kg}^{-1}$  (Fig. 12g, h, i).

### 3.5 Relationship between SSA of fresh PP and meteorological data on ground

The SSA of PP should be governed by synoptic conditions and meteorological conditions in the clouds; however, meteorological conditions in the clouds cannot be fully characterized at present. The parameterization of SSA of fresh PP

- 删除: is
- 删除: deposited
- 删除:  $R_o$
- 删除: -
- 删除: case of
- 删除: (p)
- 删除:  $R_o$
- 删除: an
- 删除: e in
- 删除:  $R_o$
- 删除: M-type, including
- 删除: groups
- 删除: group
- 删除: groups
- 删除: are
- 删除: group
- 删除: show
- 删除: group
- 删除: amount
- 删除: n assumption
- 删除: reason for
- 删除: snowfall mode
- 删除: M-type snowfall group G
- 删除: the reason  $D$  and SSA in the  $G$  group are related
- 删除: in
- 删除: Group
- 删除: Therefore, t
- 删除: the degree of
- 删除:
- 删除: group
- 删除: group
- 删除: To investigate A group from this perspective, namely, PP type in the A group changed from unrimed or lightly rimed snow crystals to densely rimed, graupel-like, and ... [1]
- 删除: ,
- 删除: but
- 删除: the

should be useful to introduce the fresh PP characteristics for the snow-cover models, which are essential to predict the avalanche resulting from the weak PP layers. A previous study (Domine et al., 2007) concluded that the relationship between measured SSA of fresh PP and meteorological data on the ground was not legible in their data. One of the reasons for their conclusion originates from the PP samples collected from different sites characterized by different snow climate and synoptic conditions; therefore, their SSA values should include the influence resulting from different environments. The second reason originates from various sample measurement intervals, which were longer than those in this study; therefore, their fresh PP samples should have changed due to metamorphism before the measurements, and the metamorphism degrees varied depending on their measurement interval. Moreover, meteorological conditions and falling snow types should have varied during the sample deposition because of their longer interval. For these reasons, their conditions complicate the understanding of the relationship between SSA of fresh PP and the meteorological data on the ground. On the other hand, in this study, the SSA of fresh PP were measured at the same place with a short time interval (1–2 h), to avoid the effect of metamorphism before the measurement and the effect of meteorological fluctuations. Therefore, in this section, the possibility of parameterizing the SSA of fresh PP using the meteorological data on ground was explored. As mentioned in Section 3.4, the PP type sometimes varied even for short observation period (1–2 h) (Ishizaka et al., 2016); therefore, only the UFE data were used for the analyses (Table 1), to focus on the relationship between the SSA of uniform PP type and meteorological conditions. The following elements, averaged only over the period of snowfall (see Section 3.2), were used—air temperature ( $T_a$ ), relative humidity ( $RH$ ), wind speed ( $WS$ ), air pressure ( $p$ ), and wet-bulb temperature ( $T_w$ ) calculated using  $T_a$ ,  $RH$ , and  $p$ . The reasons for selecting these meteorological elements are that  $T_a$ ,  $RH$ ,  $WS$ , and  $T_w$  are often used for the parameterization of new snow density, as summarized by Helfricht et al. (2018). Although  $WS$  is also strongly affected by the local topography and roughness,  $WS$  and  $p$  should share a relation with the synoptic scale condition.

Figure 13 shows the correlations between the measured SSA and each meteorological variable ( $T_a$ ,  $RH$ ,  $WS$ ,  $p$ , and  $T_w$ ). Although all variables show significant correlation with measured SSA ( $p$  value < 0.05), the relationships vary with each variable. A strong, positive relationship between the measured SSA and  $WS$  was obtained with a high correlation coefficient,  $R$  ( $R = 0.74$ ); SSA increases with increasing  $WS$  (Fig. 13d). The result of this study corresponds to the results of the previous study (Harimaya and Nakai, 1999), in which the mass proportion of rime reportedly increased with an increase in the wind speed under the T and L modes.  $T_w$  shows a strong negative correlation with SSA ( $R = -0.60$ ); SSA decreases with an increase in  $T_w$  (Fig. 13e).  $T_a$  and  $RH$  show relatively low negative correlations ( $T_a$ :  $R = -0.44$ ,  $RH$ :  $R = -0.48$ ) (Figs. 13a and 13b). On the other hand, the relationship between SSA and  $p$  shows a small negative correlation ( $R = -0.30$ ) (Fig. 13c). Based on these analyses,  $WS$  and  $T_w$  were selected for the parameterization of SSA of fresh PP, because of their high  $R$  values. Moreover,  $T_w$  indirectly involves the influences of  $T_a$ ,  $RH$  and  $p$  fluctuations because  $T_w$  is calculated using those parameters. To deduce an estimation equation for SSA using  $WS$  and  $T_w$ , SSA was assumed to be linearly dependent on  $WS$  and  $T_w$ . Equation (2) is this parameterization with the least squares method:

$$SSA = 17.6WS - 9.4T_w + 58.5 \quad (R = 0.81) \quad (2)$$

削除: of

削除: should

削除: ir

削除: taken

削除: S

削除: should

削除: rom

削除: may

削除: in the meteorological conditions

書式変更: 下付き

削除: Press

書式変更: 下付き

削除: Pres

削除: s

書式変更: 下付き

削除: Press

書式変更: フォント: 斜体

書式変更: 下付き

削除: Press

削除: P

書式変更: 下付き

削除: Press

書式変更: 下付き

削除: Pres

削除: s

Here, the valid range in Eq. (2) is from 0–4 m s<sup>-1</sup> for  $WS$  and from -4–0 °C for  $T_w$ .  
Figure 14 shows the comparison between the measured SSA and the calculated SSA using Eq. (2) with  $WS$  and  $T_w$ . The residual standard error is 16.8 m<sup>2</sup> kg<sup>-1</sup>. These results indicate that the SSA of fresh PP can be calculated using meteorological data of Nagaoka. Although the equation includes the limitation of its parameterization, which is strongly site-specific, especially due to the introduction of wind speed as a parameter, this idea is the first step to introducing falling snow crystals into the snow cover models using SSA. To investigate the adaptable ratio to valid range in Eq. (2) during winter in Nagaoka, the data of 2015 winter (December 2014 - March, 2015) were analyzed using meteorological data with 1 h resolution: 445 snowfall events occurred during the winter of 2015 (here, snowfall event is defined as where the snow height increased during 1 h) and 374 cases of 445 snowfall events (84% cases of snowfall events) were in the valid range of Eq. (2). In the case of outrange in Eq. (2),  $T_w \geq 0$  °C (59 cases) and  $WS > 4$  m s<sup>-1</sup> (14 cases) (the case of  $T_w \geq 0$  °C &  $WS > 4$  m s<sup>-1</sup> : 3 cases). Therefore, there is still room for improvement to treat SSA under melting effect simulation in Eq. (2).

**3.6 Calculation of time evolution of SSA of fresh PP**  
Here, the time-evolution estimation of the SSA of fresh PP is presented using Eq. (2), for the period of Jan 27, 2015 to Feb 1, 2015, in which the synoptic meteorological conditions periodically changed (Fig. 15). Figure 16 shows the meteorological conditions ( $WS$ : wind speed,  $T_w$ : wet-bulb temperature, HS: height of snow, and P: precipitation) during this period. Calculated values of the SSA of fresh PP using Eq. (2) with 10-min meteorological data ( $WS$  and  $T_w$ ) are also shown in Fig. 16. In this figure, SSA was calculated only for the conditions where  $T_w < 0$  °C and  $P > 0$  mm, based on the 10-min meteorological data, and were then averaged over each hour to obtain hourly data. In the figure, the ranges of fluctuations of the calculated SSA during each hour and values of the measured SSA are also shown in the figure.

On 27 January, the synoptic precipitation condition was C-type (Fig. 15a). Although the precipitation had occurred, temperature was above 0 °C and most of the precipitations should have been in the liquid phase. In fact, the HS did not increase on Jan 27. The synoptic meteorological condition changed from C-type to M-type during the period of the night of 27 January to the morning of 28 January (Fig. 15b). The temperature dropped during the period, precipitation changed from liquid to solid state and the HS increased during this period. The calculated SSA gradually increased during this period (Fig. 16). The M-type condition continued from the morning of 28 January to 29 January (Fig. 15c). During this period, the temperature remained low and precipitation occurred in the solid state. HS increased continuously and the calculated SSA remained large during this period (Fig. 16). The temperature gradually increased as the cyclone lashed from the south to the north along the Japanese archipelago on 30 January (Fig. 15d). Although no precipitation occurred during the morning of 30 January, solid precipitation occurred in the evening of the same day with small values of the calculated SSA. On 31 January, the synoptic meteorological condition gradually changed from C-type to M-type (Fig. 15e). Because the temperature was high, only liquid precipitation occurred, and the HS decreased during this period. The first of February, the condition was M-type (Fig. 15f) and the temperature dropped to the low condition. Therefore, solid precipitation occurred with large values of the calculated SSA.

削除: of  
削除: For example, 2015 winter (December 2014 - March, 2015), 445 snowfall events occurred in SIRC (here, snowfall event is defined that snow height increased during 1 hour) and 374 cases of 445 snowfall events (84% cases of snowfall events) were in the valid range of Eq. (2). In the case of outrange in Eq. (2),  $T_w \geq 0$  °C (59 cases) and  $WS > 4$  m s<sup>-1</sup> (14 cases) (the case of  $T_w \geq 0$  °C &  $WS > 4$  m s<sup>-1</sup> : 3 cases). Therefore, there is still room for improvement to treat SSA under melting effect simulation in Eq. (2).  
書式変更: フォント : 斜体  
書式変更: 上付き  
削除: in  
削除: the

削除:  $\sigma$

削除: total depth  
削除: cover  
削除: Fresh

削除: condition

When the calculated SSA and the measured SSA are compared, it can be seen that the former can reproduce the fluctuation in the measured SSA (SSA increased after the morning of 28 January and SSA decreased on 30 January), although absolute values show some differences between each other. As discussed in Section 3.4, if the PP with  $SSA < 90 \text{ m}^2 \text{ kg}^{-1}$  were considered to be unrimed snow crystals, which should transform into a weak PP layer, the results imply two possibilities (28 January and 30 January) of weak PP layer development during the study period. In fact, the unrimed PPs were observed in Nagaoka on Jan 30, 2015 (Fig. 17). For these reasons, this study has considered that calculating the SSA using Eq. (2) with meteorological data is an efficient first step toward describing the development of the weak PP layer in the snow cover model.

#### 4. Conclusions

A total of 102 SSAs of fresh PP were measured shortly after their deposition (1–2 h) at the SIRC in NIED during four winters (2013/2014, 2014/2015, 2015/2016, 2016/2017) in Nagaoka, one of the regions in Japan that receives the heaviest snowfalls and located in a coastal region facing the Sea of Japan in Honshu Island. The measured SSA values ranged widely between 42–153  $\text{m}^2 \text{ kg}^{-1}$ . To investigate the cause of variation in the SSA of fresh PP, the influence of melting during its fall was analyzed. The SSAs of fresh PP under the melting condition show smaller values than that without melting. Besides this, the relationship between the measured SSA and synoptic meteorological conditions – monsoon-type (M-type) and cyclone-type (C-type) – was also analyzed. The measured SSAs under C-type are smaller than those of M-type, because the snow crystals under C-type are unrimed snow crystals, while those under M-type are mostly rich-rimed snow crystals and graupels. Furthermore, a detailed investigation of SSA under M-type was conducted with various snowfall modes determined using the radar data. The results indicate the possibility that unrimed and slightly rimed snow crystals occurred at a specific snowfall mode (S mode) even under M-type. This result implies that the weak PP layer with unrimed/slightly rimed snow crystals can develop not only under C-type but also under M-type snowfalls. The analysis of comparisons between the SSA values of PP and their properties (averaged fall speed, averaged apparent size, and initial deposited density) confirms that the SSA of PP is strongly influenced by their physical properties.

Based on the analyses using the measured meteorological data on ground, the values of SSA were found to be strongly dependent on the wind speed ( $WS$ ) and the wet-bulb temperature ( $T_w$ ); SSA increases with an increase in  $WS$  while SSA decreases with an increase in  $T_w$ . Using  $WS$  and  $T_w$ , the equation to estimate the SSA of fresh PP was derived. This equation helped simulate the fluctuation of SSA of fresh PP during the period in which the C-type and M-type snowfalls appeared periodically. Although, regardless of limiting site-dependent parameterization, especially due to the introduction of wind speed as a parameter in the empirical equation, the equation to simulate the SSA with meteorological data is an efficient first step towards describing the weak PP layer in the new snow-cover model.

This study focuses on estimating the SSA of fresh PP, that would help in designing a predictive model for slab avalanche caused by weak PP layer. However, to implement the development process of weak PP layer in the snow-cover model with the SSA, the dependency of physical characteristics of PP type on SSA values needs to be investigated in future studies.

削除: during

削除: s

削除: t

削除: calculation

削除: the authors of this study observed the unrimed PPs

削除: ly

削除: from

削除: 0

削除: 0

削除: , in particular the degree of riming

削除:

削除: Thus,

削除: a

削除:

削除: it has its limits stemming from site-dependent parameterization

削除: ,

削除: in

削除: the

削除: of

削除: s

削除: the

削除: its

Moreover, this study discussed the SSA of ~~fresh~~ PP under ~~only~~ one climatic condition. Additional similar measurements of SSA of fresh snow in other climatic conditions are required for understanding further the SSA of fresh snow. For further parameterizing ~~of~~ the SSA of ~~fresh~~ PP, it is necessary to use the meteorological conditions of the cloud on which the SSA of fresh PP strongly depends. To promote this parameterization, further studies could compare the results of this study with detailed information on precipitation particles produced from the numerical meteorological model, such as the Japan Meteorological Agency's non-hydrostatic model (JMA-NHM, Saito et al., 2006), with the option of double-moment bulk cloud microphysics scheme (Hashimoto et al. 2018a, 2018b) or the WRF model (Skamarock et al., 2008), which includes the P3 scheme (Predicted Particles Properties; Morrison and Milbrandt, 2015).

10 ACKNOWLEDGEMENT

We would like to acknowledge the members of SIRC for ~~their participation in~~ useful discussions. ~~Helpful comments and suggestions from L. Leppänen and one anonymous reviewer are greatly appreciated.~~ This study was part of the project "Research on combining risk monitoring and forecasting technologies for mitigation of diversifying snow disasters". This study was also supported by JSPS KAKENHI, Grant Numbers JP23221004 (SIGMA PJ), JP15H01733 (SACURA PJ) and JP16K01340.

References

Akitaya, E. and Nakamura, K.: Formation of weak layers caused by snow crystals fallen in worm front. Snow and Ice in Hokkaido (a bulletin of the Hokkaido branch, Japanese Society of Snow and Ice), 32, 10– 13, 2013 (in Japanese).

Akitaya, E. and Shimuzu, H.: Observations of weak layers in a snow cover. Low Temperature Science, Ser. A, Physical sciences, 46, 67-75. <http://hdl.handle.net/2115/18548>, 1988 (in Japanese with English abstract).

Aoki, T., Kuchiki, K., Niwano, M., Kodama, Y., Hosaka, M. and Tanaka, T.: Physically based snow albedo model for calculating broadband albedos and the solar heating profile in snowpack for general circulation models, J. Geophys. Res., 116, D11114, doi:10.1029/2010JD015507, 2011.

Arakawa, H., Izumi, K., Kawashima, K., and Kawamura, T: Study on quantitative classification of seasonal snow using specific surface area and intrinsic permeability, Cold. Reg. Sci. Technol., 59, 163-168. Doi:10.1016/j.coldregions.2009.07.004, 2009.

Araki, K.: Snowfall characteristics of heavy snowfall events associated with cyclones causing surface avalanche in Nasu, Japan. Seppyo, 80(2), 131-147, 2018 (in Japanese with English abstract).

Bohren, C. F., and Albrecht, A. B.: Atmospheric Thermodynamics. Oxford University Press, 402pp, 1998.

Brun, E., David, P., Sudul M. and Brunot G.: A numerical model to simulate snow-cover stractigraphy for operational avalanche forecasting. J. Glaciol., 38(128), 13-22. <https://doi.org/10.3189/S002214300000955>, 1992.

删除: flesh

删除: only

删除: flesh

删除: the

删除: “.

- Cabanes, A., Legagneux, L. and Domine, F.: Evolution of the specific surface area and of crystal morphology of Arctic fresh snow during the ALERT 2000 campaign. *Atmos. Environ.*, 36, 2767–2777, doi:10.1016/S1352-2310(02)00111-5, 2002.
- Cabanes, A., Legagneux, L. and Domine, F.: Rate of evaluation of the specific surface area of surface snow layers, *Environ. Sci. Technol.*, 37, 661-666, 2003.
- 5 Carmagnola, C. M., Morin, S., Lafaysse, M., Domine, F., Lesaffre, B., Lejeune, Y., Picard, G., and Arnaud, L.: Implementation and evaluation of prognostic representations of the optical diameter of snow in the SURFEX/ISBA-Crocus detailed snowpack model, *The Cryosphere*, 8, 417-437, <https://doi.org/10.5194/tc-8-417-2014>, 2014.
- Colle A. B., Stark, D., Yuter, E. S.: Surface microphysical observations within east coast winter storms on Long Island, New York. *Mon. Wea. Rev.*, 142, 3126-3146. Doi: 10.1175/MWR-D-14-00035.1, 2014.
- 10 Colonne, N., Geindreau, C., Flin, F., Morin, S., Lesaffre, B., Rolland du Roscoat, S., and Charrier, P.: 3-D image-based numerical computations of snow permeability: links to specific surface area, density, and 15 modelling of structural anisotropy. *The Cryosphere*, 6, 939-951. Doi:10.5194/tc-6-939-2012, 2012.
- Domine, F., Cabanes, A., Taillandier, A. -S. and Legagneux, L.: Specific surface area of snow samples determined by CH<sub>4</sub> adsorption at 77 K and estimated by optical microscopy and scanning electron microscopy. *Environ. Sci. Technol.*, 35, 771–780, doi:10.1021/es001168n, 2001.
- 15 Domine, F., Salvatori, R., Legagneux, L., Salzano, R., Fily, M. and Casacchia, R.: Correlation between the specific surface area and the short wave infrared (SWIR) reflectance of snow. *Cold Reg. Sci. Tech.*, 46, 60-68, doi:10.1016/j.coldregions.2006.06.002, 2006.
- Domine, F., Taillandier, A. -S. and Simpson, W. R.: A parameterization of the specific surface area of seasonal snow for field use and for models of snowpack evolution. *J. Geophys. Res.*, 112, F02031, doi:10.1029/2006JF000512, 2007.
- 20 Domine, F., Albert, M., Huthwelker, T., Jacobi, W., Kokhanovsky, A. A., Lehning, M., Picard, G., and Simpson, W. R.: Snow physics as relevant to snow photochemistry. *Atmos. Chem. Phys.*, 8, 171-208. [www.atmos-chem-phys.net/8/171/2008/](http://www.atmos-chem-phys.net/8/171/2008/), 2008.
- Fassnacht, R. S., Innes, J., Kouwen, N., and Soulis D. E.: The specific surface area of fresh dendritic snow crystals. *Hydrol. Process*, 13, 2945-2962, 1999
- 25 [Grenfell, T. C., and S. G. Warren: Representation of a nonspherical ice particle by a collection of independent spheres for scattering and absorption of radiation, \*J. Geophys. Res.\*, 104\(D24\), 31,697–31,709, doi:10.1029/1999JD900496, 1999](#)
- Hachikubo, A., Yamaguchi, S., and Aoki, T.: Improved apparatus for measuring specific surface area of snow by the methane adsorption method. *Proceedings International Snow Science Workshop*, 7-12, October, 2018, Innsbruck, Austria, (in press), 2018.
- 30 Hachikubo, A., Yamaguchi, S., Tanikawa, T., Hori, M., Sugiura, K., Niwano, M., Kuchiki, K. and Aoki, T. : Development of the device for measuring snow specific surface area by gas adsorption. *Snow and Ice in Hokkaido (a bulletin of the Hokkaido branch, Japanese Society of Snow and Ice)*, 31, 45– 48, 2012 (in Japanese)

- Hachikubo, A., Yamaguchi, S., Arakawa, H., Tanikawa, T., Hori, M., Sugiura, K., Niwano, M., Kuchiki, K. and Aoki, T.: Investigation of adsorbent for a measurement of snow specific surface area by the gas-adsorption method. Proceedings International Snow Science Workshop, 7–11 October, 2013, Grenoble, France, 73–77, 2013.
- 5 Hachikubo, A., Yamaguchi S., Arakawa, H., Tanikawa, T., Hori, M., Sugiura K., Matoba, S., Niwano, M., Kochiki K., Aoki, T.: Effects of temperature and grain type on time variation of snow specific surface area. Bull. Glaciol. Res, 32, 47–53, doi: 10.5331/bgr.32.47, 2014.
- Harimaya, T.: The riming properties of snow crystals. J. Meteor. Soc. Japan, 53, 384-392. [https://doi.org/10.2151/jmsj1965.53.6\\_384](https://doi.org/10.2151/jmsj1965.53.6_384). 1975.
- 10 Harimaya, T. and Nakai, Y.: Riming Growth Process Contributing to the Formation of Snowfall in Orographic Areas of Japan facing the Japan Sea. J. Meteor. Soc. Japan, 77, 101-115. [https://doi.org/10.2151/jmsj1965.77.1\\_101](https://doi.org/10.2151/jmsj1965.77.1_101). 1999.
- Hashimoto, A., Motoyoshi, H., Misumi, R. and Orikasa, N.: Sophistication of snow property prediction by numerical weather model, Snow and Ice in Hokkaido (a bulletin of the Hokkaido branch, Japanese Society of Snow and Ice), 37, Accepted. 2018a (in Japanese).
- 15 Hashimoto, A., Motoyoshi, H., Misumi, R. and Orikasa, N.: Multivariable scheme for diagnosing ice particle features in a bulk microphysics model. 15<sup>th</sup> Conference on Cloud Physics, 1D-94. 2018b. <https://ams.confex.com/ams/15CLOUD15ATRAD/webprogram/Paper346686.html>
- Helfricht, K., Hartl, L., Koch, R., Marty, C., and Olefs, M.: Obtaining sub-daily new snow density from automated measurements in high mountain regions. Hydrol. Earth Syst. Sci., 22, <https://doi.org/10.5194/hess-22-2655-2018>. 2018.
- Ikeda, S: A study of snow-pack characteristics in Hakuba backcountry. Seppyo, 69, 489-499, [https://www.jstage.jst.go.jp/article/seppyo1941/69/4/69\\_4\\_489/\\_pdf/-char/en](https://www.jstage.jst.go.jp/article/seppyo1941/69/4/69_4_489/_pdf/-char/en), 2007 (in Japanese with English abstract).
- 20 Ishizaka, M., Motoyoshi H., Nakai S., Shiina T., Kumakura T., and Muramoto K.: A New Method for Identifying the Main Type of Solid Hydrometeors Contributing to Snowfall from Measured Size-Fall Speed Relationship. J. Meteor. Soc. Japan, 91,747-762, doi:10.2151/jmsj.2013-602, 2013.
- Ishizaka, M., Motoyoshi, H., and S., Yamaguchi: Cold-type Habits Snow Crystals brought by a Low Pressure System and Relevance to an Avalanche. Japan Society Snow Engineering, 34(4), 186-191, 2018.
- 25 Ishizaka, M., Motoyoshi, H., Yamaguchi, S., Nakai, S., Shiina, T., and Muramoto, K.-I.: Relationships between snowfall density and solid hydrometeors, based on measured size and fall speed, for snowpack 16odelling applications, The Cryosphere, 10, 2831-2845, <https://doi.org/10.5194/tc-10-2831-2016>, 2016.
- Ishizaka, M., Shiina, T., Nakai, S., Sato, A., Iwamoto, K. and Muramoto, K.: A method for automated identification of types of solid precipitation by image processing Part 2 Verification of the method applied to variety of solid precipitations observed at Nagaoka. Seppyo, 66, 647-659, 2004 (in Japanese with English abstract).
- 30

- Kamiishi, I. and Nakamura, K.: Snow disaster caused by a cyclonic heavy snowfall in February, 2014, and countermeasures taken by the NIED and its future direction for disaster prevention. Natural Disaster Research Report, 49, 1-10, [http://dil-opac.bosai.go.jp/publication/nied\\_natural\\_disaster/pdf/49/49-02.pdf](http://dil-opac.bosai.go.jp/publication/nied_natural_disaster/pdf/49/49-02.pdf), 2016 (in Japanese with English abstract).
- 5 Kamiishi, I., Namakura, K., Adachi, S., and Yamashita, K. : Avalanche Disaster Caused by a Cyclonic Heavy Snowfall on February, 2014. Natural Disaster Research Report, 49, 31-37, [http://dil-opac.bosai.go.jp/publication/nied\\_natural\\_disaster/pdf/49/49-05.pdf](http://dil-opac.bosai.go.jp/publication/nied_natural_disaster/pdf/49/49-05.pdf), 2016 (in Japanese with English abstract).
- Kerbrat, M., Pinzer, B., Huthwelker, T., Gäggeler, H. W., Ammann, M. and Schneebeli, M. : Measuring the specific surface area of snow with X-ray tomography and gas adsorption: comparison and implications for surface smoothness. Atmos. Chem. Phys., 8, 1261–1275, doi:10.5194/acp-8-1261-2008, 2008.
- 10 Lachapelle, R. E.: The relationship of crystal riming to avalanche formation in new snow. Physics of Snow and Ice: Proceedings, 1(2), 1169-1175, <http://hdl.handle.net/2115/20368>, 1967.
- Lehning, M., Bartelt, P., Brown, B., Russi, T., Stoeckli, U., and Zimmerli, M.: SNOWPACK model calculations for avalanche warning based upon a new network of weather and snow stations, Cold Reg. Sci. Technol. 30, 145–157, 1999.
- Legagneux, L., Cabanes, A. and Dominé, F.: Measurement of the specific surface area of 176 snow samples using methane adsorption at 77 K. J. Geophys. Res., 107(D17), 4335, doi:10.1029/2001JD001016, 2002.
- 15 Legagneux, L., Lauzier, T., Dominé, F., Kuhs, W. F., Heinrichs, T. and Techmer, K.: Rate of decay of the specific surface area of snow during isothermal experiments and morphological changes studied by scanning electron microscopy. Can. J. Phys., 81, 459–468, doi:10.1139/P03-025, 2003.
- Legagneux, L., Taillandier, A. -S. and Domine, F. : Grain growth theories and the isothermal evolution of the specific surface area of snow. J. Appl. Phys., 95, 6175–6184, doi:10.1063/1.1710718, 2004.
- 20 Legagneux, L. and Domine, F.: A mean field model of the decrease of the specific surface area of dry snow during isothermal metamorphism. J. Geophys. Res., 110, F04011, doi:10.1029/2004JF000181, 2005.
- Locatelli J. D., and Hobbs P. V.: Fall speed and mass of solid precipitation particles. J. geophys. Res., 79, 21885-2197, doi:10.1029/JC079i015p02185, 1974.
- 25 Magono, C. and C. W. Lee: Meteorological classification of natural snow crystals. J. Fac. Sci., Hokkaido Univ., Ser. VII, 2, 321-335, <https://eprints.lib.hokudai.ac.jp/dspace/handle/2115/8672>, 1966.
- Matsuo, T., Sasyo, Y., and Sato, Y.: Relationship between types of precipitation on the ground and surface meteorological elements. J. Meteor. Soc., Japan, 59, 462-476, 1991.
- Matsumura, E.: A study of avalanche forecasting in Niseko mountain areas. Master thesis of Faculty of Env. Earth Science, Hokkaido Univ. pp52, 2002 (in Japanese).
- 30 McCammon, I., and J. Schweizer: A field method for identifying structural weaknesses in the snowpack, in Proceedings of the ISSW 2002, edited by J. R. Stevens, 477–481, Int. Snow Sci. Workshop Can., B. C. Minist. Of Transp., Snow Avalanche

- Programs, Victoria, B. C., Canada, 2002.,  
<http://citeseerx.ist.psu.edu/viewdoc/download?doi=10.1.1.627.9129&rep=rep1&type=pdf>.
- McClung, D. M., and Schaerer P. A. : The avalanche handbook. Seattle, WA, The Mountaineers, pp278, 1993.
- Morrison, H. and Milbrandt, J. A. : Parameterization of cloud microphysics based on the prediction of bulk ice particle properties. Part I : Scheme description and idealized tests, *J. Atmos. Sci.*, 72, 287–311, doi:10.1175/JAS-D-14-0065.1, 2015.
- Mosimann, L., Steiner, M., Collett, J. L., Henrich, W., Schmid, W., and Waldvogel, A. : Ice crystal observations and the degree of riming in winter precipitation. *Water, Air, Soil Poll.*, 68, 29-42. doi: 10.1007/BF00479391, 1993.
- Mosimann, L., Weingartner, E., and Waldvogel, A.: An analysis of accreted drop size and mass on rimed snow crystals. *J. Atmos. Sci.*, 51, 1548-1558. [https://doi.org/10.1175/1520-0469\(1994\)051%3C1548:AAOADS%3E2.0.CO;2](https://doi.org/10.1175/1520-0469(1994)051%3C1548:AAOADS%3E2.0.CO;2), 1994.
- Nakai, S., Iwanami, K., Misumi, R., Park, S., and Kobayashi, T.: A Classification of Snow Clouds by Doppler Radar Observations at Nagaoka, Japan. *SOLA*, 1, 161–164. Doi:10.2151/sola.2005–042, 2005.
- Nakai, S., Kosugi, K., Yamaguchi, S., Yamshita, K., Sato, K., Adachi, S., Ito, Y., Nemoto, M., Nakamura, K., Motoyoshi, H., Hirashima, H., Kamiishi, I., Oda, K., Ishizaka, M., Abe, O., Sato, T.: Study on Advanced Snow Information and its Application to Disaster Mitigation: An overview. *Bulletin of Glaciological Research*, 37, 2019 (in press).
- Nakamura, K., Abe, O., Kamiishi, I.: Characteristics of avalanches caused by cyclonic heavy snowfall in February, 2014. *Journal of Snow engineering of Japan*, 30, 106-113, 2014 (in Japanese).
- Nakamura, K., Kosugi, K., Nemoto, M.: First report of investigation of Nasu avalanche accidents (26 Mar. 2017). [http://www.bosai.go.jp/seppyo/kenkyu\\_naiyou/seppyouaigai/2017/report\\_20170328\\_NasuOnsen.pdf](http://www.bosai.go.jp/seppyo/kenkyu_naiyou/seppyouaigai/2017/report_20170328_NasuOnsen.pdf), 2017 (in Japanese).
- Nakamura, K., Sato, T., Akitaya, E.: Meteorological condition for formation of weak layers by non-rimed new snow crystals. *Snow and Ice in Hokkaido (a bulletin of the Hokkaido branch, Japanese Society of Snow and Ice)*, 32, 14– 17, 2013 (in Japanese)
- Nakamura, T., Nakamura H., Abe, O., Higashiura, M., Numano, N., Yuuki, Hiroyuki, Kutsuzawa, S.: Prefectural distribution of disastrous snow avalanches and prediction of them in the northern part of Japan. *Avalanche Formation, Movement and Effect (Proceedings of the Davos Symposium, September 1986), IAHS Publ*, 162, 639-646. [http://hydrologie.org/redbooks/a162/iahs\\_162\\_0639.pdf](http://hydrologie.org/redbooks/a162/iahs_162_0639.pdf), 1987.
- Narita, H., and Takeuchi, M.: Difference of repose angle of snow between dry surface avalanche that can slip through the avalanche prevention facilities and a point-starting dry surface avalanche, *Snow and Ice in Hokkaido (a bulletin of the Hokkaido branch, Japanese Society of Snow and Ice)*, 28, 33-36, 2009 (in Japanese).
- Ozeki, T. and Akitaya, E.: Wide area survey focusing on weak layers. *Snow and Ice in Hokkaido (a bulletin of the Hokkaido branch, Japanese Society of Snow and Ice)*, 14, 32– 35, 1995 (in Japanese)
- Saito, K., Fujita, T., Yamada, Y., Ishida, J., Kumagai, Y., Aranami, K., Ohmori, S., Nagasawa, R., Kumagai, S., Muroi, C. : The operational JMA nonhydrostatic mesoscale model. *Monthly Weather Review*, 134, 1266-1298, 2006.

- Schleef, S.: X-ray microtomography analysis of isothermal new snow densification. Doctor Thesis, DISS. ETH NO. 21856. 122pp, 2014.
- Shidei, T.: Some observations on one special type of new snow avalanche which occurred in Yamagata and Fukushima prefectures in 1952. *Seppyo*, 14, 2-5, 1953 (in Japanese).
- 5 Skamarock, W. C., Klemp, B. J., Dudhia, J., Gill, O. D., Barker, M. D., Duda, G. M., Huang, X.-Y., Wang, W. and Powers, G. J.: A Description of the Advanced Research WRF Version 3. NCAR/TN-475+STR NCAR TECHNICAL NOTE. Colorado, USA: Mesoscale and Microscale Meteorological Division, National Center for Atmospheric Research. PP113, <http://dx.doi.org/10.5065/D68S4MVH>, 2008.
- 10 Taillandier, A. -S., Domine, F., Simpson, W. R., Sturm, M. and Douglas, T. A. : Rate of decrease of the specific surface area of dry snow: Isothermal and temperature gradient conditions. *J. Geophys. Res.*, 112, F03003, doi:10.1029/2006 JF000514, 2007.
- Vionnet, V., Brun, E., Morin, S., Boone, A., Faroux, S., Le Moigne, P., Martin, E., and Willemet, J.-M.: The detailed snowpack scheme Crocus and its implementation in SURFEX v7.2, *Geosci. Model Dev.*, 5, 773-791, <https://doi.org/10.5194/gmd-5-773-2012>, 2012.
- 15 Wiscombe, W. J., and Warren , G. S.: A model for the spectral albedo of snow: I. Pure snow, *J. Atmos. Sci.*, 37, 2712–2733, doi:10.1175/1520-0469(1980)037<2712:AMFTSA>2.0.CO;2, 1980.
- Yamaguchi, S., Hirashima, H., Ishii, Y.: Year-to-year changes in preferential flow development in a seasonal snowpack and their dependence on snowpack conditions. *Cold Reg. Scie. Technol.*, 149, 95-105, <https://doi.org/10.1016/j.coldregions.2018.02.009>, 2018.
- 20 Yamaguchi, S., Iwamoto K., Nakai S.: Interannual fluctuations of the relationship between winter precipitation and air temperature in the heavy-snowfall zone of Japan. *Ann. Glaciol.*, 54, 183-188, <https://doi.org/10.3189/2013AoG62A302>, 2013.

5

Table 1 List of data set

| Name                         | Condition                                                      | Sample number | Section     |
|------------------------------|----------------------------------------------------------------|---------------|-------------|
| All data                     | Data including all measured data                               | 102           | Section 3.1 |
| no melt events (NME)         | Data without melting in All data                               | 72            | Section 3.2 |
|                              | Web-bulb temperature (Tw) <0 °C                                |               | Section 3.3 |
| melt events (ME)             | Data with melting in All data                                  | 30            | Section 3.2 |
|                              | Web-bulb temperature (Tw) ≥ 0 °C                               |               |             |
| uniform fallings event (UFE) | Data with a single PP type during the deposition period in NME | 49            | Section 3.4 |
|                              |                                                                |               | Section 3.5 |

表の書式変更

10

Table 2 Summary of data sets in Domine et al. (2007), Schleef (2014)

| Name                            | Measurement method            | Observation sites           |
|---------------------------------|-------------------------------|-----------------------------|
| Dom2007<br>(Domine et al, 2007) | methane gas adsorption method | French Alps, Arctic, Alaska |
| Sch2014<br>(Schleef, 2014)      | X-ray microtomography         | Davos in Swiss              |

削除: 1

Table 3 Classification of snowfall mode (modification of Table 1 in Nakai et al (2005))

|                                          |                                                                                      |
|------------------------------------------|--------------------------------------------------------------------------------------|
| L mode<br>(Longitudinal line)            | Bands running or cells aligned nearly parallel to the prevailing wind                |
| T mode<br>(Transversal line)             | Bands running or cells aligned with a large angle relative to the prevailing wind    |
| S mode<br>(Spreading precipitation)      | Widely spreading, relatively uniform precipitation                                   |
| V mode<br>(Meso- β scale vortex)         | Vortices and associated curved bands with a significant change of the wind direction |
| M mode<br>(Mountain-slope precipitation) | Area of stationary precipitation around the windward slope of the mountains          |
| D-mode<br>(Local-frontal band)           | A wide band is considered to form along a line of discontinuity                      |

削除: 2

削除: 1

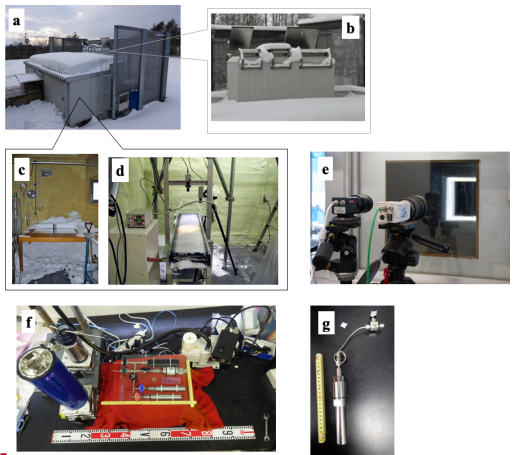

Fig.1. Falling Snow Observatory (FSO) ~~and the device developed for the methane adsorption method at the SIRC~~  
 a. Overview of FSO, which is surrounded with defensive fence against wind effect  
 b. Roof opening system on the cold room  
 c. Table in the cold room, on which snow sample is naturally deposited through the roof opening  
 d. The system to automatically take falling snow crystal photos on the belt conveyer with a close-up camera  
~~e. Falling snow particle observation system using CCD camera~~  
~~f. Potable developed device for the methane adsorption method~~  
~~g. Sample folder for measurement of SSA~~

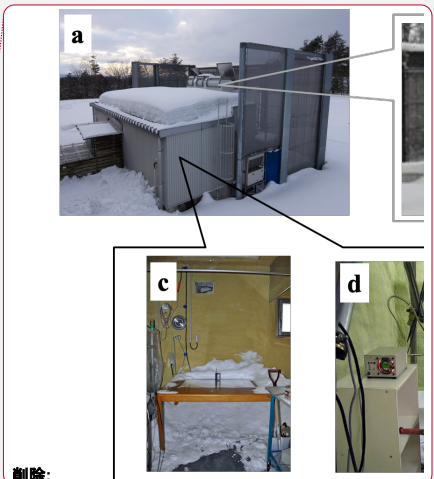

~~削除:~~  
~~削除:~~ at the SIRC

~~書式変更:~~ フォント : 10 pt  
~~削除:~~ ~~削除:~~  
~~書式変更:~~ フォント : 10 pt

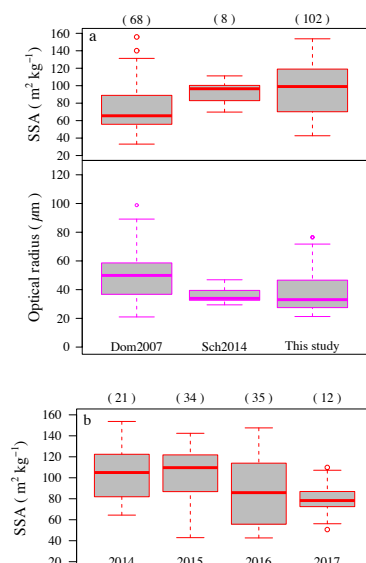

Fig. 2. Measurement results of SSA

a: Comparison between the measurement results at Nagaoka and those of fresh snow reported in previous studies.  
Red box plots show SSA values and Pink box plots show optical grain radius calculated for the data sets using Eq. (1)  
 Dom2007: data in Domine et al. (2007)  
 Sch2014: data of natural snow in Schleef (2014)  
 This study: data at Nagaoka  
 b: Measurement results of SSA for each year  
 2014: data measured in 2013/2014 winter  
 2015: data measured in 2014/2015 winter  
 2016: data measured in 2015/2016 winter  
 2017: data measured in 2016/2017 winter  
 Each box plot shows median, 25 and 75% percentiles,  $1.5 \times$  interquartile ranges, and outliers  
 Values in parenthesis are sample numbers

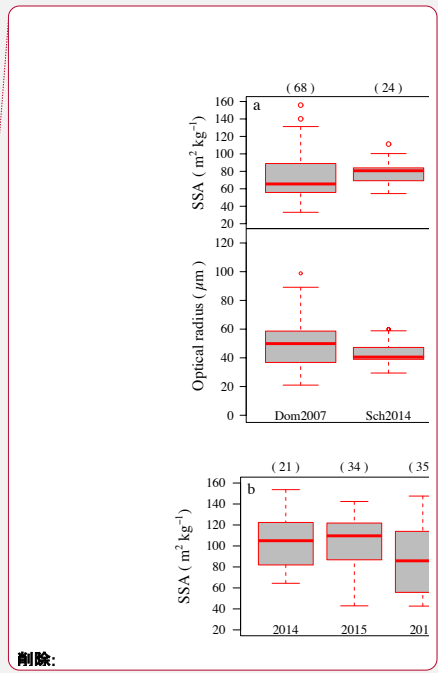

削除:

削除: by  
 削除: 削除

削除: 削除  
 削除: 削除

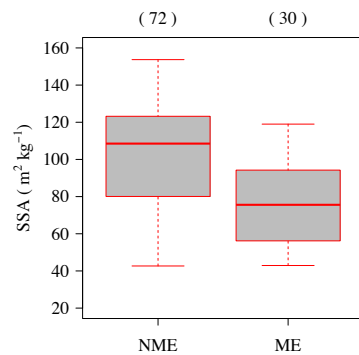

Fig. 3. SSA data classification based on the consideration of melting using wet-bulb temperature ( $T_w$ )  
NME (*No melt events*): data with  $T_w < 0\text{ }^{\circ}\text{C}$   
ME (*Melt events*): data with  $T_w \geq 0\text{ }^{\circ}\text{C}$   
Each box plot shows median, 25 and 75% percentiles,  $1.5 \times$  interquartile ranges, and outliers  
Values in parenthesis are sample numbers

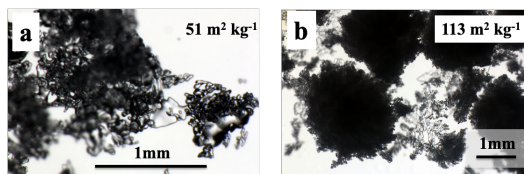

Fig. 4. Microphotographs of samples taken under melt events  
a: Sample with  $T_w = 0.6$  °C  
b: Sample with  $T_w = 0.03$  °C

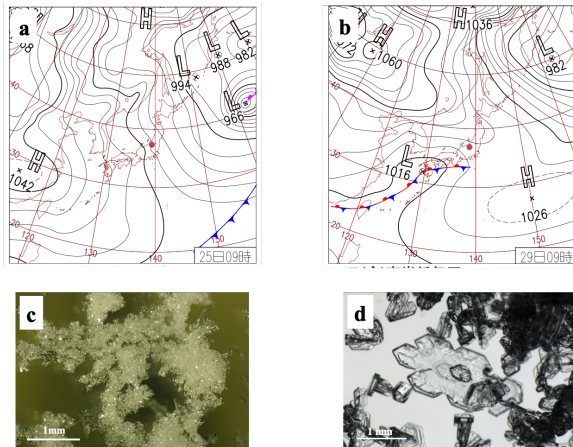

Fig. 5. Synoptic atmospheric pressure condition of falling snow events in Nagaoka.  
 Red circles indicate the location of Nagaoka.  
 a: Synoptic weather chart at 9:00 A.M. on 25 Jan. 2016, as an example of M-type  
 b: Synoptic ~~weather~~ chart at 9:00 A.M. on 29 Jan. 2016, as an example of C-type  
 c: Microphotograph of fresh PP deposited on a table in a cold room under the condition of a  
 d: Microphotograph of fresh PP deposited on a table in a cold room under the condition of b  
 Weather charts were produced by the Japan Meteorological Agency  
 (<http://www.data.jma.go.jp/fcd/yoho/hibiten/index.html>).

削除: Weather

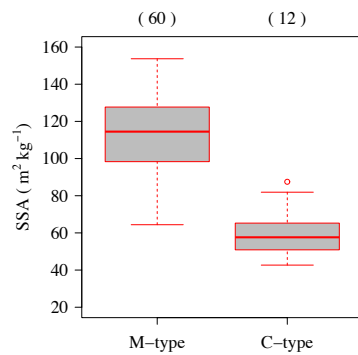

Fig. 6. Dependency of SSA of fresh PP on synoptic scale condition  
M-type: Monsoon type  
C-type: Cyclone type  
Each box plot shows median, 25 and 75% percentiles,  $1.5 \times$  interquartile ranges, and outliers  
Values in parenthesis are sample numbers

删除: 1

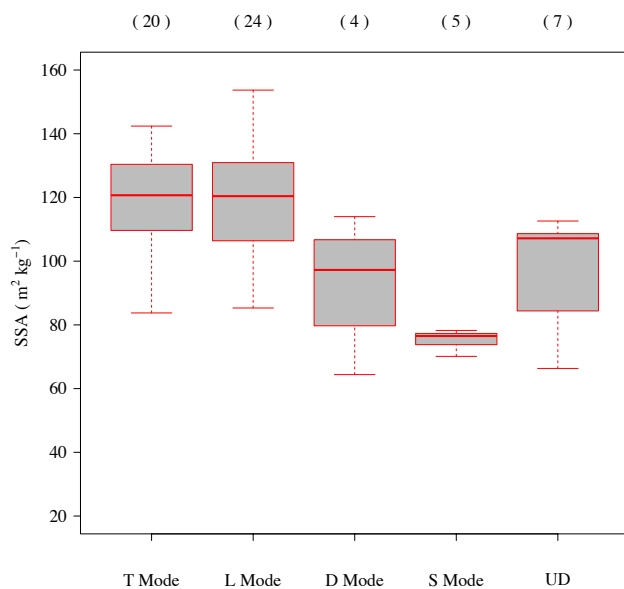

Fig. 7. Dependency of SSA of fresh PP on snowfall modes during M-types  
 Each mode is [described](#) in Table 1. UD indicates data whose snowfall mode could not be determined.  
 Each box plot shows median, 25 and 75% percentiles,  $1.5 \times$  interquartile ranges, and outliers  
 Values in parenthesis are sample numbers

削除: shown

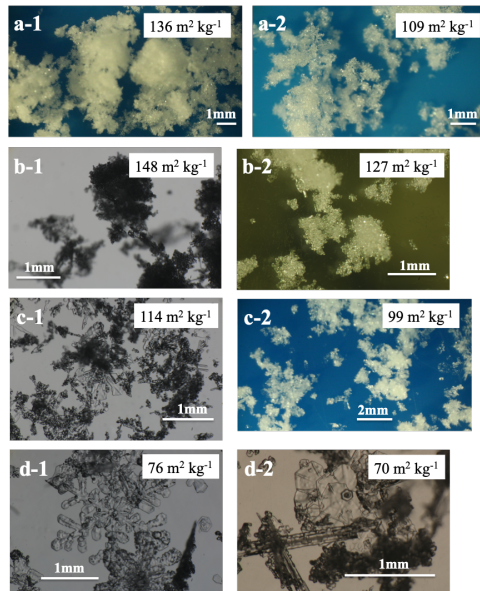

Fig. 8. Microphotographs of samples for each snowfall mode  
a-1 and a-2 were taken under T mode  
b-1 and b-2 were taken under L mode  
c-1 and c-2 were taken under D mode  
d-1 and d-2 were taken under S mode  
Values in the figures are the measured SSAs.

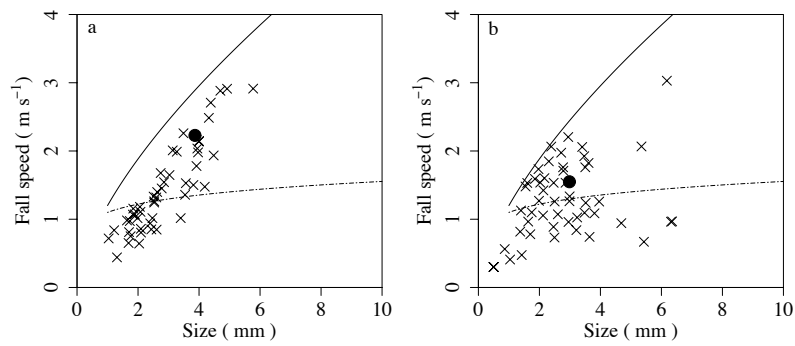

Fig. 9. The distribution of CMF with 1 min, and the integrated CMFs for events  
a: Example case of *uniform falling event* (9:40–10:40 on Jan 25, 2016)  
b: Example case of *variant falling event* (9:10–10:00 on Feb 10, 2015)  
x-mark: CMF of each 1 min. Black circle: Averaged CMF  
Solid line: conical graupel (Locatelli and Hobbs, 1974)  
Broken line: Densely rimed aggregate (Locatelli and Hobbs, 1974)

削除: .

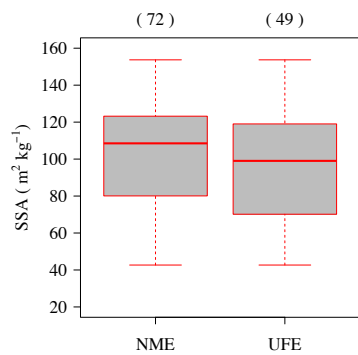

Fig. 10. Comparison between the data of *no melt event* and *uniform falling event*. NME indicates the data of *no melt event* and UFE indicates *uniform falling event*. Each box plot shows median, 25 and 75% percentiles,  $1.5 \times$  interquartile ranges, and outliers. Values in parenthesis are sample numbers

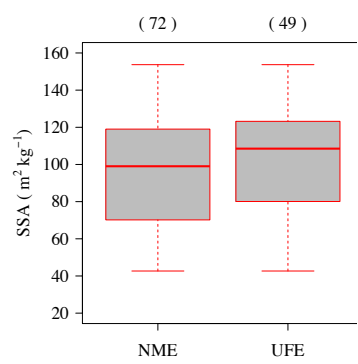

删除:  
 删除: data of  
 删除:  
 删除: the data of

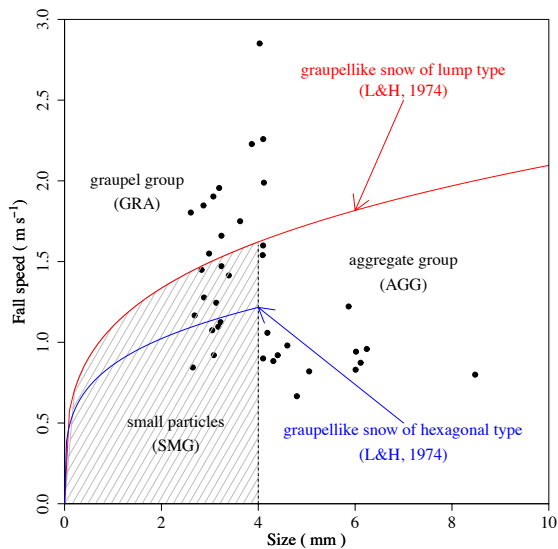

Fig.11. Categories used in snowfall event classification, showing their location in terms of size–fall speed coordinates. The two curves represent size–fall speed relationships for lump-type (red curve) and hexagonal-type graupels (blue curve) (from Locatelli and Hobbs, 1974, denoted as L&H, 1974 on the graph).  
Black circles are data under M-type in UFE.

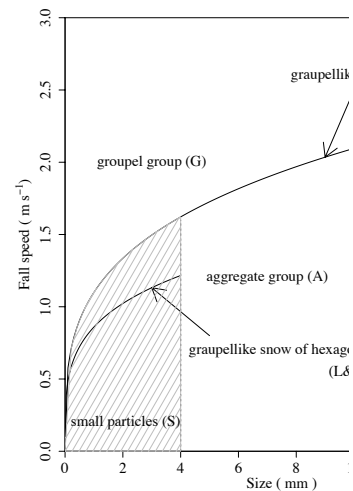

削除:

削除:

削除:

削除: The figure was revised from Ishizaka et al. (2016)

書式変更: 左揃え

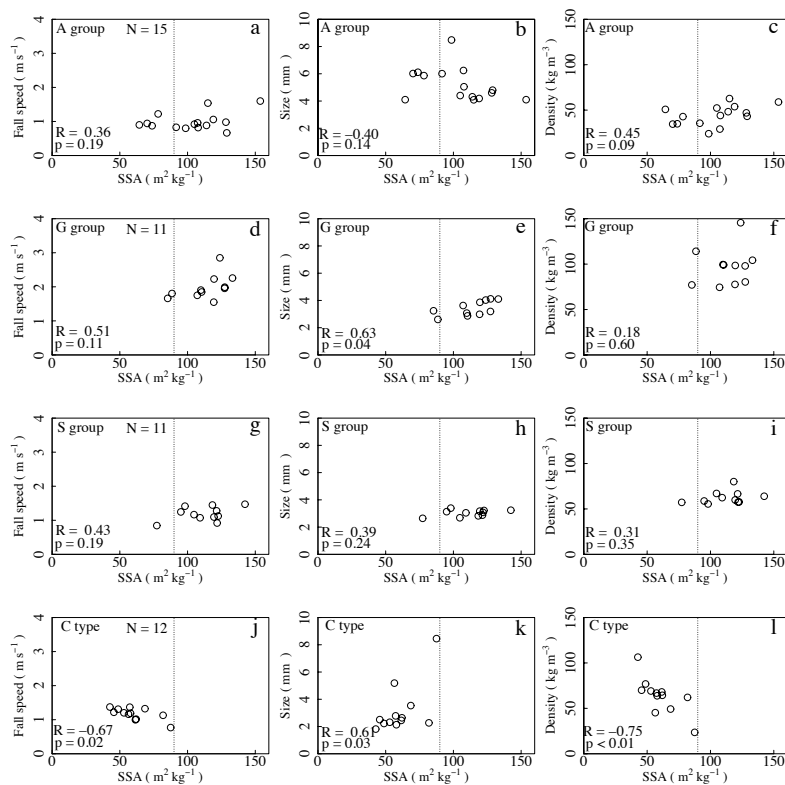

Fig. 12. Relationship between SSA of freshly fallen snow and detailed characteristics of falling snow produced by the CMF.

a, b, c: data of aggregate group events in M-type (A group)

d, e, f: data of graupel type events in M-type (G group)

g, h, i: data of small particle type events in M-type (S group)

j, k, l: data in C-type (C type)

N: sample number, R: correlation coefficient, and p: p values

Dotted lines indicate SSA value of  $90 \text{ m}^2 \text{kg}^{-1}$

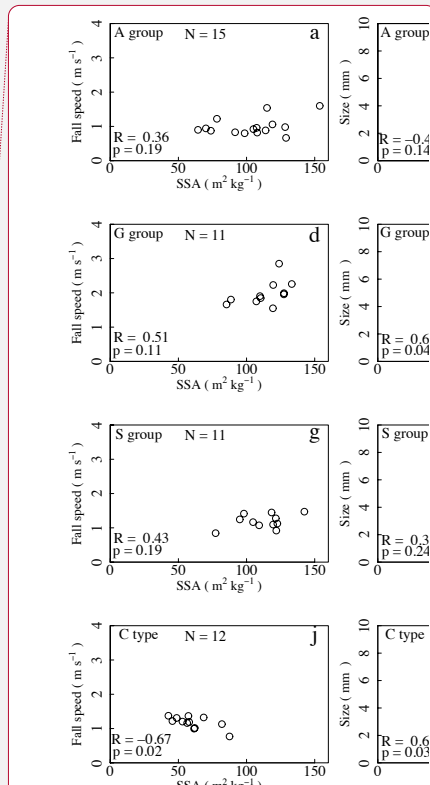

削除:

削除: grou

削除: p

削除: the

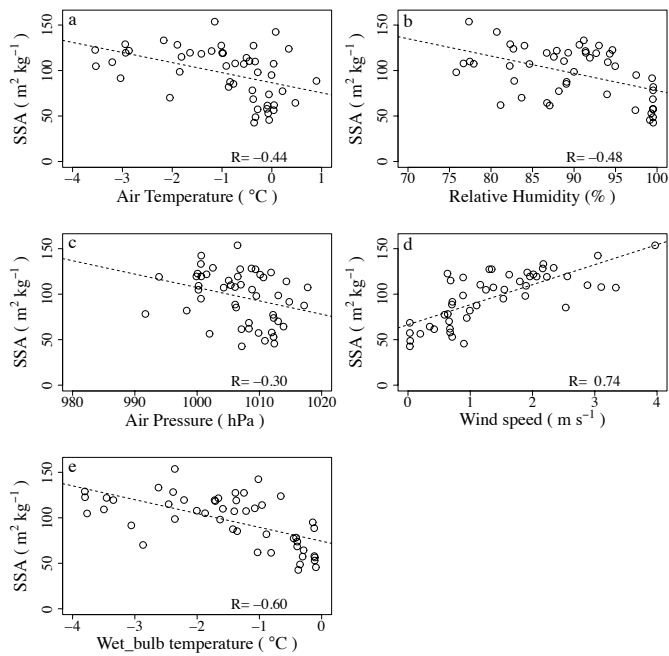

Fig. 13. Relationships between meteorological elements and measured SSA  
a: relationship between air temperature and measured SSA  
b: relationship between relative humidity and measured SSA  
c: relationship between air pressure and measured SSA  
d: relationship between wind speed and measured SSA  
e: relationship between bulb-wet temperature and measured SSA

Broken lines are results of linear approximation

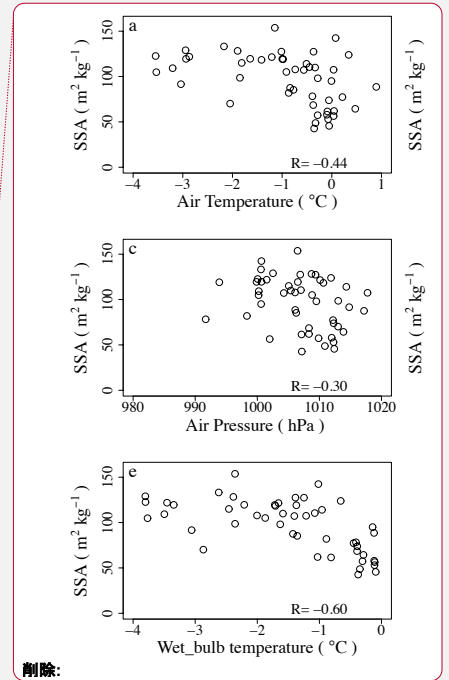

删除:

删除:

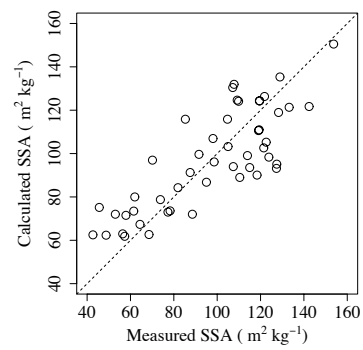

Fig. 14. Comparison between measured SSA and calculated SSA using Eq. (2)  
Dotted line indicates 1:1 line

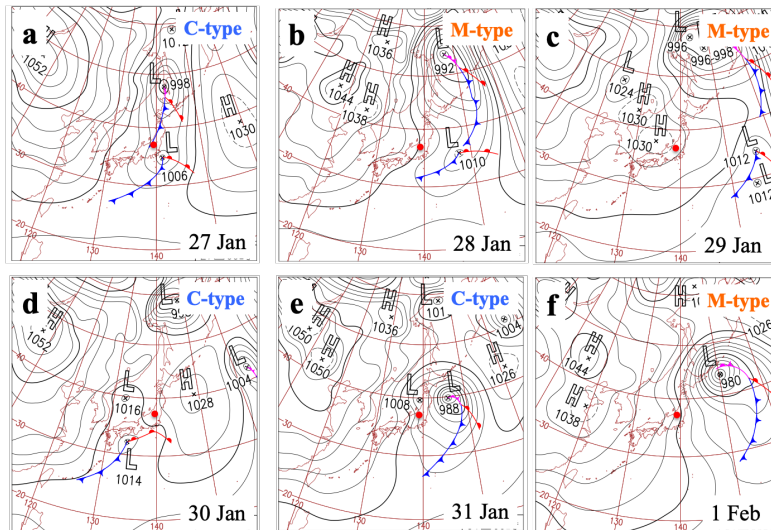

Fig. 15. Synoptic atmospheric pressure condition during the period from Jan 27 to Feb 1, 2015.

Red circles indicate the location of Nagaoka

Each weather chart shows the condition at 09:00. a.m. (JST)

Weather charts were produced by the Japan Meteorological Agency (<http://www.data.jma.go.jp/fcd/yoho/hibiten/index.html>).

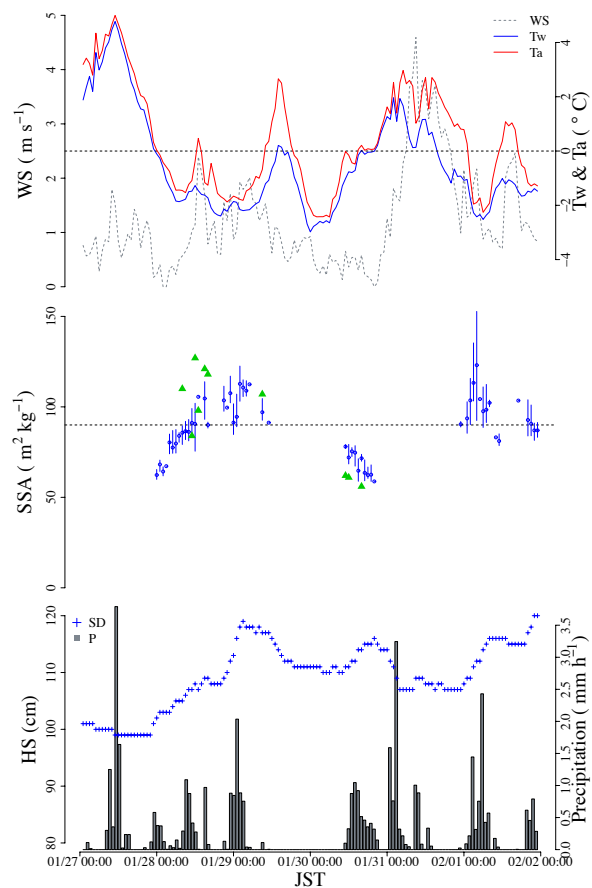

Fig. 16. Simulation results of SSA fluctuations using meteorological data during the period from Jan 27 to Feb 1, 2015 (JST)

WS: wind speed, Tw: wet-bulb temperature, Ta: air temperature, HS: height of snow, P: precipitation. Blue bars with circles show the fluctuation of simulated SSA during each 1 h and green triangles show measured SSA

削除: total depth

削除: cover

削除: P

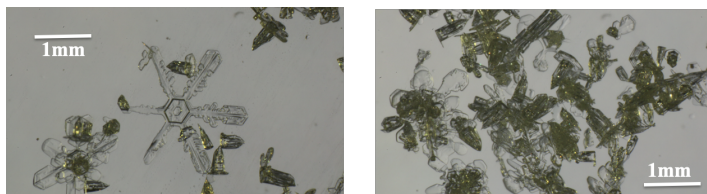

Fig. 17. Unrimed precipitation particles observed at Nagaoka (11:00 a.m. on Jan 30, 2015(JST))

▼

▲
